# Supplementary material
Source: PubMed Central journal article supplement (PMC4048321)
Supplement: NIHMS523510-supplement-1.pdf [file NIHMS523510-supplement-1.pdf]

## Supplementary information

### Generation of a novel therapeutic peptide that depletes MDSC in tumor-bearing mice

Hong Qin<sup>1,5\*</sup>, Beatrisa Lerman<sup>1,5\*</sup>, Ippei Sakamaki<sup>1,5\*</sup>, Guowei Wei<sup>1,5</sup>, Soungchul Cha<sup>1,5</sup>, Sheetal S. Rao<sup>1,5</sup>, Jianfei Qian<sup>1,5</sup>, Yared Hailemichael<sup>2,5</sup>, Roza Nurieva<sup>3,5</sup>, Karen C. Dwyer<sup>4,5</sup>, Johannes Roth<sup>6</sup>, Qing Yi<sup>1,5</sup>, Willem W. Overwijk<sup>2,5</sup> & Larry W. Kwak<sup>1,5</sup>

<sup>1</sup> Departments of Lymphoma and Myeloma, <sup>2</sup> Melanoma Medical Oncology, <sup>3</sup> Immunology, <sup>4</sup> Stem Cell Transplantation and <sup>5</sup> Center for Cancer Immunology Research, The University of Texas MD Anderson Cancer Center, Houston, Texas, 77030, U.S.A. <sup>6</sup> Institute of Immunology, University of Muenster, 48149 Muenster, Germany.

Corresponding author:

Larry W. Kwak, MD, PhD

Professor and Chairman, Dept. of Lymphoma and Myeloma

Co-Director, Center for Cancer Immunology Research

The University of Texas MD Anderson Cancer Center

1515 Holcombe Boulevard, Unit 0429, Houston, Texas 77030

E-mail: [lkwak@mdanderson.org](mailto:lkwak@mdanderson.org)

Telephone: (713) 745-4252

Fax: (713) 563-4625

\* These authors contributed equally to this study

**Supplementary Figure 1**

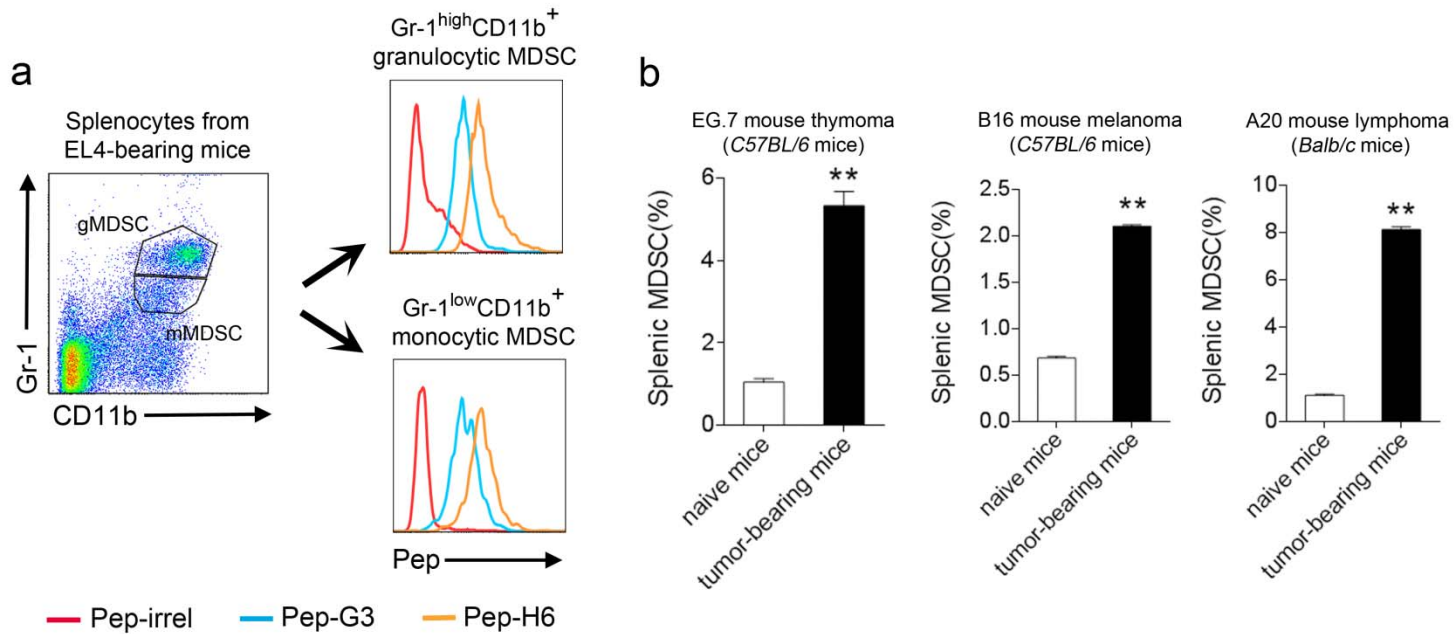

**Supplementary Figure 1. Peptibodies recognized MDSC in tumor-bearing mice.** (a) Binding of FITC-conjugated Pep-H6 or Pep-G3 on Gr-1<sup>high</sup>CD11b<sup>+</sup> gated granulocytic MDSC (gMDSC) and Gr-1<sup>low</sup>CD11b<sup>+</sup> gated monocytic MDSC (mMDSC) in splenocytes from EL4-bearing *C57BL/6* mice ( $n = 5$ ). A non-specific peptibody (Pep-irrel) was used as a negative control. (b) Increase of MDSC in tumor-challenged mice. Splenocytes from naive mice or mice challenged with various tumors ( $n = 3$  for each tumor type) were stained for CD11b and Gr-1 to identify MDSC. Frequencies of splenic MDSC are shown as mean  $\pm$  s.e.m. (\*\*  $P < 0.01$  compared with naïve mice by two-tailed student's  $t$  test).

**Supplementary Figure 2**

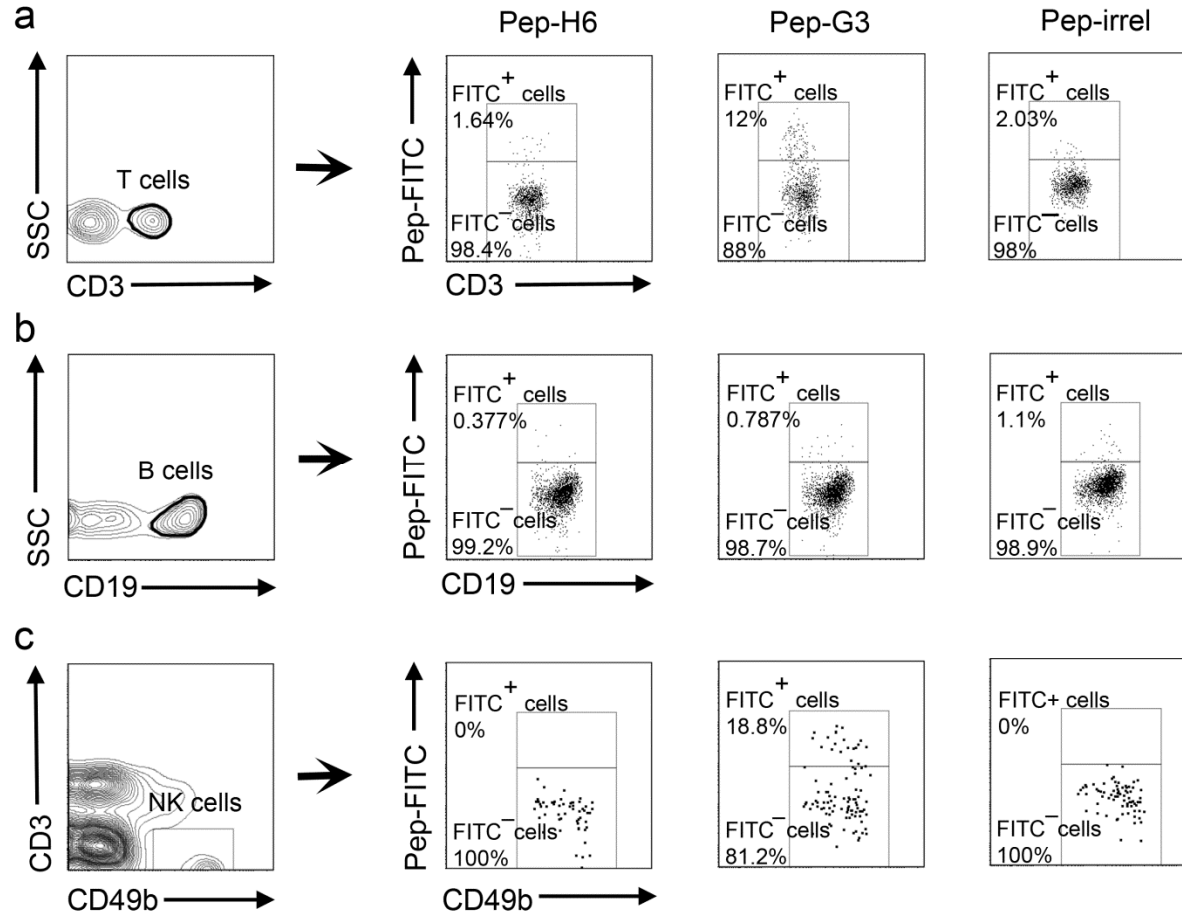

**Supplementary Figure 2. Lack of peptibody binding on lymphocyte subsets.** Splenocytes pooled from EL4-bearing *C57BL/c* mice ( $n = 5$ ) were gated on  $CD3^+$  T cells (a),  $CD19^+$  B cells (b) and  $CD3^-CD49b^+$  NK cells (c), respectively, and analyzed for peptibody binding.

**Supplementary Figure 3**

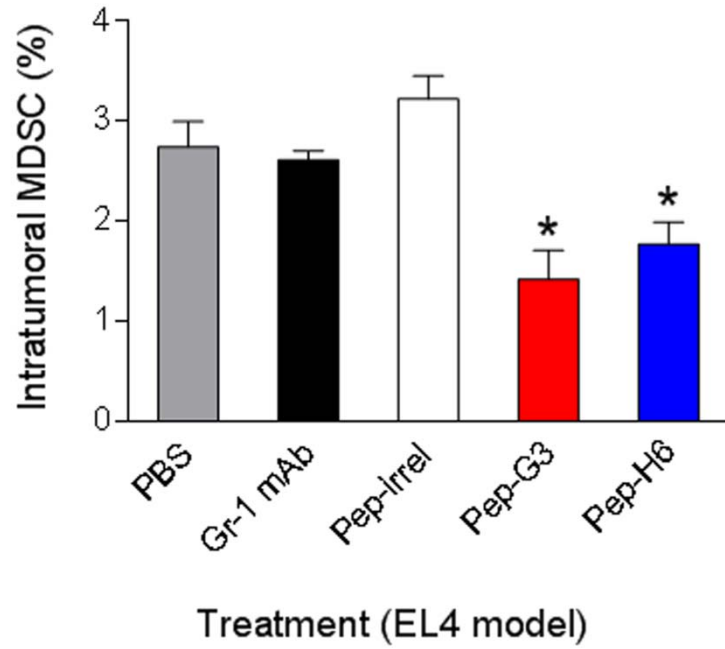

**Supplementary Figure 3. Depletion of intratumoral MDSC in EL4 tumor-challenged mice by peptibody treatment.** Groups of 5 *C57BL/6* mice were challenged s.c. with EL4 tumor cells followed by peptibody treatment as in Fig. 3a. The percentage of Gr-1<sup>+</sup>CD11b<sup>+</sup> MDSC from single cell suspensions prepared from tumors harvested on Day 20 is shown as mean  $\pm$  s.e.m. (\*  $P < 0.01$  compared with PBS by two-tailed student's *t* test).

Supplementary Figure 4

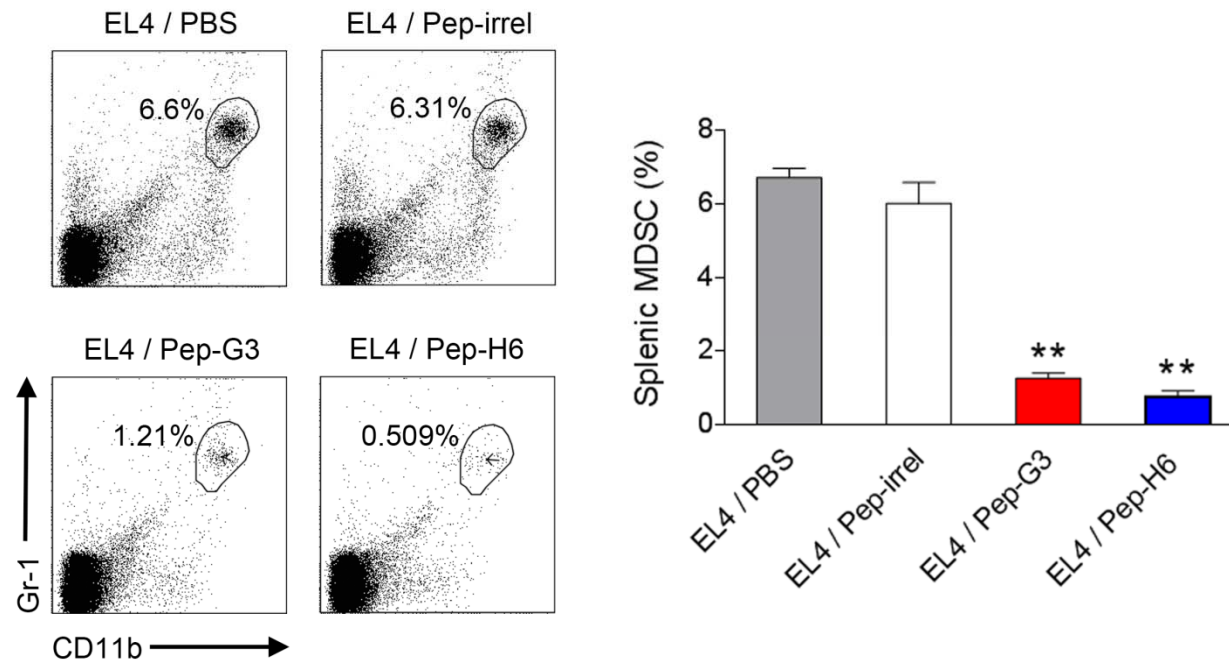

**Supplementary Figure 4. Long-term administration did not diminish peptibody-induced MDSC depletion.** As in Fig. 3g, EL4-bearing *C57BL/6* mice were treated with peptibodies every other day for 2 weeks. At the end of treatment, splenocytes were harvested and stained for Gr-1<sup>+</sup>CD11b<sup>+</sup> MDSC shown as the mean  $\pm$  s.e.m. of 5 mice per group. Plots are shown with frequency of splenic MDSC for individual representative mice. Differences between groups were analyzed by two-tailed Student's *t*-test. The data represent 2 independent experiments.

**Supplementary Figure 5**

[S10A9\\_MOUSE](#) Mass: 13211 Score: 127 Matches: 8(5) Sequences: 4(3) emPAI: 2.69  
 Protein S100-A9 OS=Mus musculus GN=S100a9 PE=1 SV=3

| Query                | Observed | Mr(expt)  | Mr(calc)  | ppm  | Miss | Score | Expect  | Rank | Unique | Peptide                                                      |
|----------------------|----------|-----------|-----------|------|------|-------|---------|------|--------|--------------------------------------------------------------|
| <a href="#">24</a>   | 409.6955 | 817.3764  | 817.3752  | 1.51 | 0    | 27    | 0.051   | 1    | U      | K.APSQMER.S                                                  |
| <a href="#">729</a>  | 587.2882 | 1172.5619 | 1172.5608 | 0.94 | 1    | (25)  | 0.1     | 1    | U      | M_ANKAPSQMER.S <a href="#">728</a>                           |
| <a href="#">760</a>  | 595.2852 | 1188.5558 | 1188.5557 | 0.07 | 1    | 26    | 0.08    | 1    | U      | M_ANKAPSQMER.S                                               |
| <a href="#">1201</a> | 690.3394 | 1378.6643 | 1378.6625 | 1.30 | 0    | 53    | 0.0002  | 1    | U      | R_QMVEAQLATFMK.K                                             |
| <a href="#">1580</a> | 841.4318 | 1680.8491 | 1680.8471 | 1.16 | 0    | 54    | 0.00017 | 1    | U      | R.SITTIIDTFHQYSR.K <a href="#">1581</a> <a href="#">1582</a> |

MANKAPSQMERSITTIIDTFHQYSRKEGHPDTLSKKEFRQMVEAQLATFMKKEKRNEAL  
 INDIMEDLDTNQDNQLSFEECMMLMAKLI FACHEKHLHENNPRGHGHS HGKGC GK

Protein sequence coverage: 35.4%

[S10A8\\_MOUSE](#) Mass: 10345 Score: 552 Matches: 12(12) Sequences: 2(2) emPAI: 2.72  
 Protein S100-A8 OS=Mus musculus GN=S100a8 PE=1 SV=3

| Query                | Observed  | Mr(expt)  | Mr(calc)  | ppm  | Miss | Score | Expect   | Rank | Unique | Peptide                                                                                     |
|----------------------|-----------|-----------|-----------|------|------|-------|----------|------|--------|---------------------------------------------------------------------------------------------|
| <a href="#">2755</a> | 1213.1040 | 2424.1934 | 2424.1882 | 2.15 | 0    | 104   | 1.6e-009 | 1    | U      | R.ELDINSDNAINFEEFLAMVIK.V <a href="#">2752</a> <a href="#">2753</a>                         |
| <a href="#">2756</a> | 809.0721  | 2424.1946 | 2424.1882 | 2.62 | 0    | (55)  | 0.00014  | 1    | U      | R.ELDINSDNAINFEEFLAMVIK.V <a href="#">2751</a> <a href="#">2754</a>                         |
| <a href="#">2783</a> | 1221.1024 | 2440.1903 | 2440.1832 | 2.92 | 0    | (104) | 1.5e-009 | 1    | U      | R.ELDINSDNAINFEEFLAMVIK.V <a href="#">2782</a>                                              |
| <a href="#">3199</a> | 928.8013  | 2783.3822 | 2783.3779 | 1.53 | 0    | 68    | 5.5e-006 | 1    | U      | K.ALSNLIDVYHNYSNIQGNHHALYK.N <a href="#">3190</a> <a href="#">3198</a> <a href="#">3200</a> |

MPSELEKALSNLIDVYHNYSNIQGNHHALYKNDFKKMVTTECPQFVQNININLENLFR  
 ELDINSDNAINFEEFLAMVIKVGVASHKDSHKE

Protein sequence coverage: 55.1%

**Supplementary Figure 5. Pep-G3 also immunoprecipitated S100 family proteins.** Proteomic analysis of eluates of Pep-G3-bound, sorted MDSC lysates isolated from immobilized Protein A revealed predominant peptides with homology to S100A9 and A8 proteins. Control eluates of non-peptibody bound, sorted MDSC lysates from Protein A displayed peptides possessing homology only to keratin (not shown).

**Supplementary Figure 6**

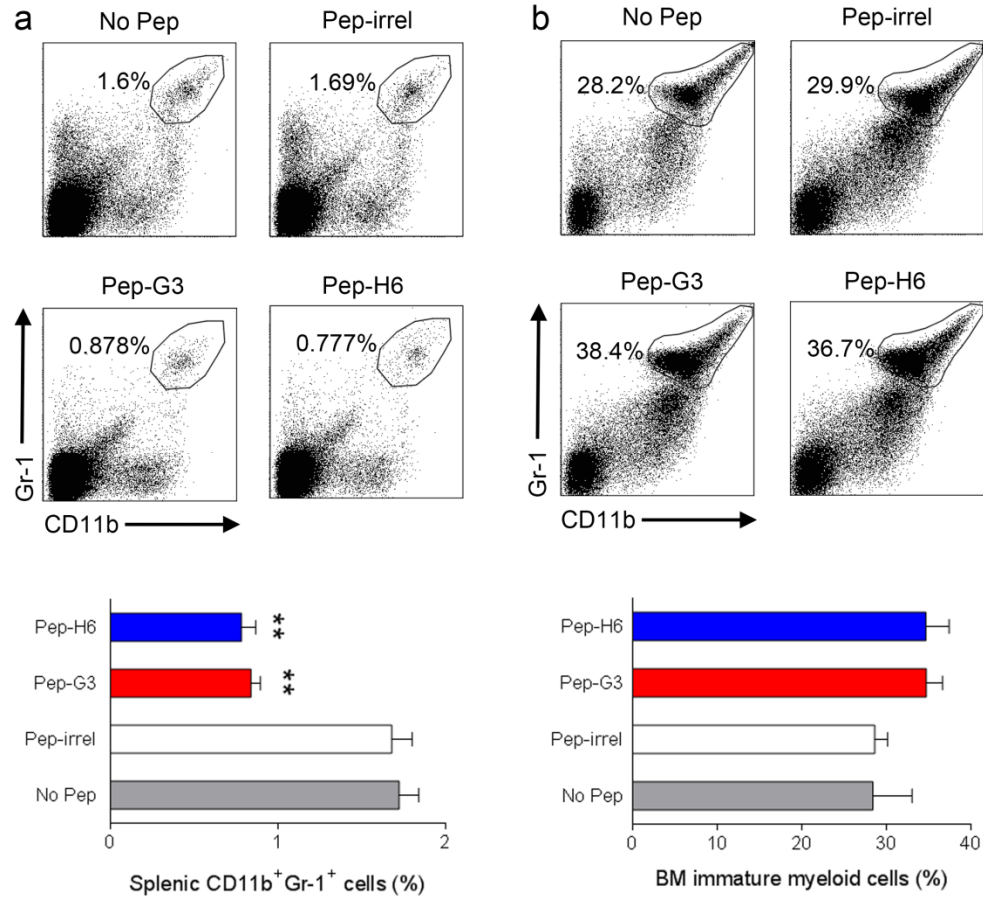

**Supplementary Figure 6. Peptibodies did not cause bone marrow toxicity.** Frequencies of Gr1<sup>+</sup>CD11b<sup>+</sup> splenic MDSC (a) or bone marrow immature myeloid cells (b) from naive C57BL/6 mice treated with peptibodies for 3 consecutive days. Untreated (No Pep) or Pep-irrel-treated mice served as negative controls. Data are shown as the mean ± s.e.m of 3 mice per group. \*\* *P* < 0.01 compared with untreated mice (No pep)] by two-tailed Student's *t*-test.

**Supplementary Table 1. Peptibody treatment corrected aberrant neutrophilia in EL4-bearing C57BL/6 mice**

|                                 | Non-tumor bearing |       |       | EL4 / PBS |       |       | EL4 / Pep-irrel |       |       | EL4 / Pep-G3 |      |      | EL4 / Pep-H6 |      |      |
|---------------------------------|-------------------|-------|-------|-----------|-------|-------|-----------------|-------|-------|--------------|------|------|--------------|------|------|
|                                 | M1                | M2    | M3    | M1        | M2    | M3    | M1              | M2    | M3    | M1           | M2   | M3   | M1           | M2   | M3   |
| WBC ( $10^3 \mu\text{l}^{-1}$ ) | 2.9               | 8.68  | 3.72  | 18.4      | 14.79 | 19.86 | 12.82           | 19.26 | 19.92 | 5.12         | 3.3  | 4.05 | 2.84         | 3.28 | 2.78 |
| RBC ( $10^6 \mu\text{l}^{-1}$ ) | 9.35              | 10.77 | 10.47 | 7.98      | 9.17  | 8.65  | 9.55            | 8.49  | 8.28  | 8            | 9.07 | 8.77 | 8.74         | 9.79 | 8.89 |
| HGB (g dl <sup>-1</sup> )       | 13.8              | 16    | 15.8  | 11.6      | 13.2  | 12.6  | 13.5            | 12.1  | 12.2  | 11.5         | 13   | 12.5 | 12.8         | 14.4 | 13.4 |
| PLT ( $10^3 \mu\text{l}^{-1}$ ) | 686               | 1167  | 975   | 721       | 1044  | 596   | 896             | 1125  | 721   | 559          | 506  | 750  | 694          | 1199 | 933  |
| NEUT (%)                        | 9.9               | 7.4   | 8.5   | 50        | 51.6  | 49    | 44              | 59.4  | 58    | 26           | 30   | 18   | 12           | 12.3 | 11   |
| LYMPH (%)                       | 85.3              | 88.2  | 85.7  | 35        | 40.6  | 40    | 45              | 31.7  | 33    | 59           | 63   | 79   | 84           | 81.9 | 82   |
| MONO (%)                        | 1.6               | 1.4   | 2.2   | 3         | 1.3   | 1     | 3               | 1.1   | 1     | 0            | 0    | 0    | 0            | 0.5  | 1    |
| EOS (%)                         | 2.7               | 1.3   | 1.5   | 7         | 3.9   | 3     | 5               | 4.7   | 5     | 2            | 0    | 1    | 2            | 2.1  | 0    |
| BASO (%)                        | 0.1               | 0.6   | 0.5   | 0         | 0.7   | 0     | 0               | 0.6   | 0     | 0            | 0    | 0    | 0            | 1.6  | 0    |

Reference values for mice blood test  
(provided by Veterinary Laboratory Medicin in MD Anderosn Cancer Centger)

| Hematology  | Range                   | Female      |
|-------------|-------------------------|-------------|
| WBC         | $10^3 \mu\text{l}^{-1}$ | 2.1 – 7.1   |
| RBC         | $10^6 \mu\text{l}^{-1}$ | 7.4 – 9.9   |
| HGB         | g dl <sup>-1</sup>      | 12.1 – 16.5 |
| Platelets   | $10^3 \mu\text{l}^{-1}$ | 659 – 1427  |
| Neutrophils | %                       | 7.4 – 25.9  |
| Lymphocytes | %                       | 60.8 – 85.0 |
| Monocytes   | %                       | 0.2 – 4.4   |
| Eosinophils | %                       | 0.0 – 13.0  |
| Basophils   | %                       | 0.0 – 0.7   |



**Supplementary Table 2. List of antibodies used in studies**

| <b>Antibody</b>          | <b>Clone number</b> | <b>Working concentration</b> | <b>Supplier</b>        | <b>Catalog number</b> |
|--------------------------|---------------------|------------------------------|------------------------|-----------------------|
| Anti-CD3-PerCP           | 145-2C11            | 1 $\mu\text{g ml}^{-1}$      | BD Biosciences         | 553067                |
| Anti-CD11b-APC           | M1/70               | 1 $\mu\text{g ml}^{-1}$      | BD Biosciences         | 553312                |
| Anti-CD11b-PerCP         | M1/70               | 1 $\mu\text{g ml}^{-1}$      | BD Biosciences         | 550993                |
| Anti-CD11c-PerCP         | HL3                 | 1 $\mu\text{g ml}^{-1}$      | BD Biosciences         | 560584                |
| Anti-CD19-APC            | 1D3                 | 1 $\mu\text{g ml}^{-1}$      | BD Biosciences         | 550992                |
| Anti-CD49-PE             | HM $\alpha$ 2       | 1 $\mu\text{g ml}^{-1}$      | BD Biosciences         | 558759                |
| Anti-Gr-1-FITC           | RB6-8C5             | 1 $\mu\text{g ml}^{-1}$      | BD Biosciences         | 553127                |
| Anti-Gr-1-PE             | RB6-8C5             | 1 $\mu\text{g ml}^{-1}$      | BD Biosciences         | 553128                |
| Anti-Ly6C-PerCP          | HK1.4               | 1 $\mu\text{g ml}^{-1}$      | BioLegend              | 128011                |
| Anti-Ly6G-PE             | 1A8                 | 1 $\mu\text{g ml}^{-1}$      | BD Biosciences         | 551461                |
| Goat anti-mouse IgG-HRP  | pAb                 | 1:10,000                     | Jackson ImmunoResearch | 115-035-166           |
| Anti 6 $\times$ His-HRP  | F24-796             | 1:1,000                      | BD Biosciences         | 552564                |
| Anti-S100A9              | 2B10                | 1:1,000                      | Abcam                  | ab105472              |
| Anti-S100A8              | EPR3554             | 1:1,000                      | Abcam                  | ab92331               |
| Goat anti-rat IgG-HRP    | pAb                 | 1:10,000                     | Jackson ImmunoResearch | 112-035-167           |
| Goat anti-rabbit IgG-HRP | pAb                 | 1:10,000                     | Jackson ImmunoResearch | 112-035-003           |
